# Supplementary material for: A pilot randomised controlled trial of an energy management programme for adults on maintenance haemodialysis: the fatigue-HD study
Source: PubMed Central journal article supplement — BMJ Open. 2022 Feb 10;12(2):e051475. doi: 10.1136/bmjopen-2021-051475 (PMC8845206; doi:10.1136/bmjopen-2021-051475), 2022-02-10
Supplement: bmjopen-2021-051475supp001.pdf [file bmjopen-2021-051475supp001.pdf]

### Appendix 1: Hedge's G Effect Size Estimates, Assuming Best-Case and Worst-Case Scenarios for Missing Data

|                      | Immediate Post-Intervention |                    | 12 Weeks Post-Intervention |                    |
|----------------------|-----------------------------|--------------------|----------------------------|--------------------|
|                      | Worst-case scenario         | Best-case scenario | Worst-case scenario        | Best-case scenario |
| <b>FSS</b>           | .27<br>Small                | .35<br>Small       | Favours control            | Favours control    |
| <b>MFIS</b>          | Favours control             | Favours control    | Favours control            | Favours control    |
| <b>Global LP</b>     | .29<br>Small                | .71<br>Medium      | .40<br>Small               | .46<br>Small       |
| <b>Global LP-S</b>   | .31<br>Small                | .65<br>Medium      | .07<br>Very small          | .08<br>Very small  |
| <b>Self-Efficacy</b> | .41<br>Small                | .68<br>Medium      | Favours control            | Favours control    |
| <b>RNLI</b>          | Favours control             | Favours control    | Favours control            | Favours control    |
| <b>COPM-P</b>        | .24<br>Small                | .80<br>Large       | .29<br>Small               | 0.98<br>Large      |
| <b>COPM-S</b>        | .02<br>Very small           | .13<br>Very small  | .50<br>Medium              | 1.59<br>Very large |
| <b>SONG-HD</b>       | No difference               | .24<br>Small       | Favours control            | Favours control    |

**Legend:** FSS = Fatigue Severity Scale; MFIS = Modified Fatigue Impact Scale; Global LP = Global Life participation; Global LP-S = Global Life Participation Satisfaction; RNLI = Reintegration to Normal Living Index; COPM-P = Canadian Occupational performance Measure – Performance Scale; COPM-S = Canadian Occupational Performance Measure – Satisfaction Scale; SONG-HD Fatigue = Standardized Outcomes in Nephrology - Hemodialysis Fatigue
